# Supplementary material
Source: PubMed Central journal article supplement (PMC1312389)

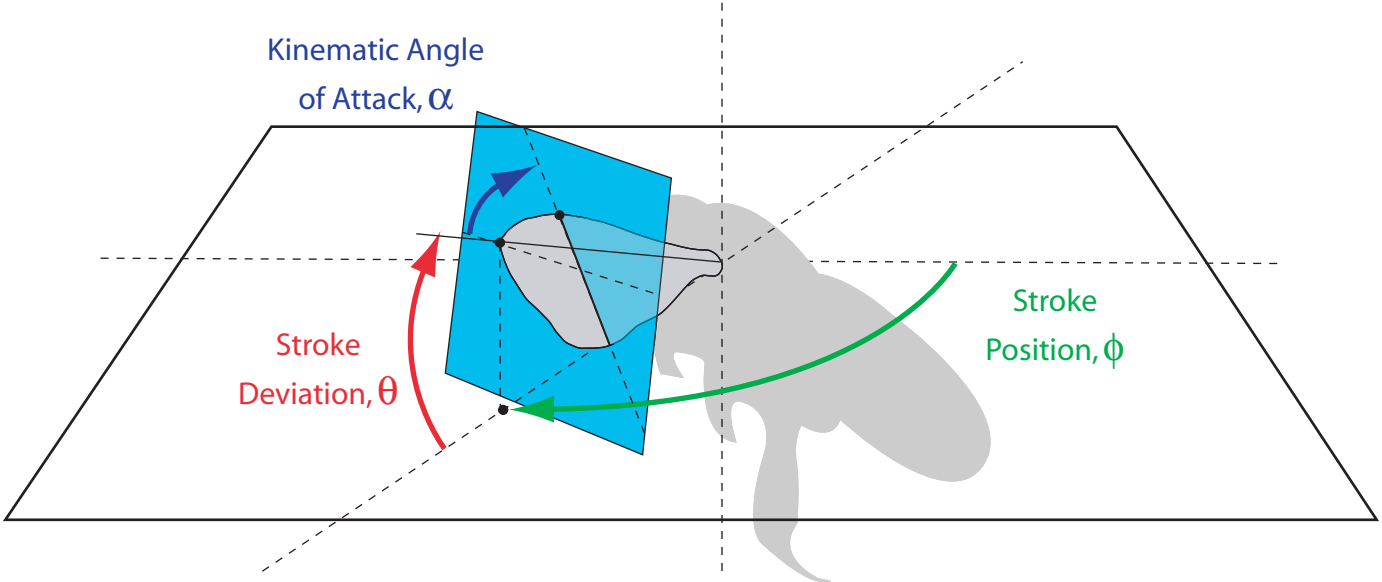

Supplement: pnas_0506590102_1.pdf [file pnas_0506590102_1.pdf]

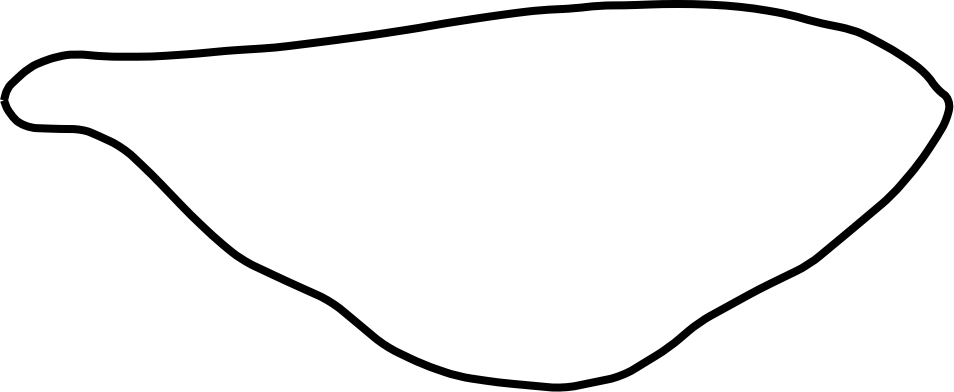

Supplement: pnas_0506590102_2.pdf [file pnas_0506590102_2.pdf]
